# Supplementary material for: Parent‐of‐origin‐environment interactions in case‐parent triads with or without independent controls
Source: PubMed Central journal article supplement (PMC5813215; doi:10.1111/ahg.12224), 2017-11-02
Supplement: AHG-82-60-s002.pdf [file AHG-82-60-s002.pdf]

Table S1: Values of  $\omega^2$ , the asymptotic variance of the log-parameter for **a)** a complete case-parent triad; and **b)** a complete case-mother dyad. The values are scaled to a sample of  $n = 1$  triad or dyad, respectively.

| a) Case-parent triad |        |             | P    |      |      |      |      |
|----------------------|--------|-------------|------|------|------|------|------|
| $RR_M$               | $RR_F$ | $RR_M RR_F$ | 0.1  | 0.3  | 0.5  | 0.7  | 0.9  |
| 1                    | 1      | 1           | 24.4 | 12.1 | 10.7 | 12.1 | 24.4 |
| 1                    | 3/2    | 2/3         | 21.2 | 11.3 | 10.8 | 13.3 | 29.3 |
| 1                    | 2      | 1/2         | 19.5 | 11.0 | 11.1 | 14.6 | 34.2 |
| 1                    | 5/2    | 2/5         | 18.6 | 10.8 | 11.5 | 15.9 | 39.1 |
| 1                    | 3      | 1/3         | 17.9 | 10.8 | 11.9 | 17.2 | 44.0 |
| 3/2                  | 1      | 3/2         | 21.2 | 11.3 | 10.8 | 13.3 | 29.3 |
| 3/2                  | 3/2    | 1           | 17.9 | 10.6 | 11.1 | 14.6 | 34.2 |
| 3/2                  | 2      | 3/4         | 16.4 | 10.4 | 11.5 | 16.0 | 39.1 |
| 3/2                  | 5/2    | 3/5         | 15.4 | 10.3 | 12.0 | 17.4 | 44.1 |
| 3/2                  | 3      | 1/2         | 14.8 | 10.3 | 12.5 | 18.7 | 49.0 |
| 2                    | 1      | 2           | 19.5 | 11.0 | 11.1 | 14.6 | 34.2 |
| 2                    | 3/2    | 4/3         | 16.4 | 10.4 | 11.5 | 16.0 | 39.1 |
| 2                    | 2      | 1           | 14.8 | 10.2 | 12.0 | 17.4 | 44.1 |
| 2                    | 5/2    | 4/5         | 13.8 | 10.1 | 12.5 | 18.8 | 49.0 |
| 2                    | 3      | 2/3         | 13.2 | 10.2 | 13.0 | 20.2 | 53.9 |
| 5/2                  | 1      | 5/2         | 18.6 | 10.8 | 11.5 | 15.9 | 39.1 |
| 5/2                  | 3/2    | 5/3         | 15.4 | 10.3 | 12.0 | 17.4 | 44.1 |
| 5/2                  | 2      | 5/4         | 13.8 | 10.1 | 12.5 | 18.8 | 49.0 |
| 5/2                  | 5/2    | 1           | 12.9 | 10.1 | 13.1 | 20.3 | 53.9 |
| 5/2                  | 3      | 5/6         | 12.3 | 10.2 | 13.6 | 21.7 | 58.9 |
| 3                    | 1      | 3           | 17.9 | 10.8 | 11.9 | 17.2 | 44.0 |
| 3                    | 3/2    | 2           | 14.8 | 10.3 | 12.5 | 18.7 | 49.0 |
| 3                    | 2      | 3/2         | 13.2 | 10.2 | 13.0 | 20.2 | 53.9 |
| 3                    | 5/2    | 6/5         | 12.3 | 10.2 | 13.6 | 21.7 | 58.9 |
| 3                    | 3      | 1           | 11.7 | 10.3 | 14.2 | 23.1 | 63.8 |
| b) Case-mother dyad  |        |             | P    |      |      |      |      |
| $RR_M$               | $RR_F$ | $RR_M RR_F$ | 0.1  | 0.3  | 0.5  | 0.7  | 0.9  |
| 1                    | 1      | 1           | 27.7 | 20.3 | 24.0 | 20.3 | 27.7 |
| 1                    | 3/2    | 2/3         | 25.4 | 21.8 | 23.0 | 19.6 | 32.0 |
| 1                    | 2      | 1/2         | 24.8 | 22.5 | 21.6 | 19.9 | 36.5 |
| 1                    | 5/2    | 2/5         | 24.7 | 22.6 | 20.7 | 20.7 | 41.3 |
| 1                    | 3      | 1/3         | 25.0 | 22.3 | 20.2 | 21.7 | 46.1 |
| 3/2                  | 1      | 3/2         | 23.2 | 17.2 | 23.0 | 24.2 | 34.8 |
| 3/2                  | 3/2    | 1           | 20.5 | 18.7 | 24.4 | 23.5 | 38.6 |
| 3/2                  | 2      | 3/4         | 19.5 | 20.2 | 24.2 | 23.6 | 42.9 |
| 3/2                  | 5/2    | 3/5         | 19.2 | 21.2 | 23.7 | 24.2 | 47.5 |
| 3/2                  | 3      | 1/2         | 19.1 | 21.8 | 23.4 | 25.1 | 52.2 |
| 2                    | 1      | 2           | 21.0 | 15.5 | 21.6 | 27.3 | 42.4 |
| 2                    | 3/2    | 4/3         | 18.2 | 16.8 | 24.2 | 27.0 | 45.5 |
| 2                    | 2      | 1           | 17.0 | 18.2 | 25.2 | 27.1 | 49.5 |
| 2                    | 5/2    | 4/5         | 16.5 | 19.6 | 25.5 | 27.6 | 53.9 |
| 2                    | 3      | 2/3         | 16.3 | 20.6 | 25.5 | 28.3 | 58.5 |
| 5/2                  | 1      | 5/2         | 19.7 | 14.5 | 20.7 | 30.0 | 50.3 |
| 5/2                  | 3/2    | 5/3         | 16.9 | 15.5 | 23.7 | 30.2 | 52.7 |
| 5/2                  | 2      | 5/4         | 15.6 | 16.9 | 25.5 | 30.3 | 56.3 |
| 5/2                  | 5/2    | 1           | 15.0 | 18.2 | 26.4 | 30.8 | 60.4 |
| 5/2                  | 3      | 5/6         | 14.7 | 19.4 | 26.9 | 31.5 | 64.8 |
| 3                    | 1      | 3           | 18.9 | 13.9 | 20.2 | 32.6 | 58.7 |
| 3                    | 3/2    | 2           | 16.0 | 14.7 | 23.4 | 33.3 | 60.2 |
| 3                    | 2      | 3/2         | 14.7 | 15.9 | 25.5 | 33.5 | 63.3 |
| 3                    | 5/2    | 6/5         | 14.0 | 17.2 | 26.9 | 33.9 | 67.2 |
| 3                    | 3      | 1           | 13.7 | 18.3 | 27.7 | 34.6 | 71.4 |

- $P$  is the frequency of the non-reference allele
- $RR_M$  and  $RR_F$  are the relative risks depending on parental origin
